# Supplementary material for: Measurement of Oxidative Stress Index in Seminal Plasma Can Predict In Vivo Fertility of Liquid-Stored Porcine Artificial Insemination Semen Doses
Source: MDPI journal article supplement (doi:10.3390/antiox10081203), 2021-07-27
Supplement: s1 [file s1]

## Article

# Measurement of Oxidative Stress Index in Seminal Plasma Can Predict In Vivo Fertility of Liquid-Stored Porcine Artificial Insemination Semen Doses

Isabel Barranco <sup>1</sup>, Camila P Rubio <sup>2,3</sup>, Asta Tvarijonaviciute <sup>3,4</sup>, Heriberto Rodriguez-Martinez <sup>5</sup> and Jordi Roca <sup>4,\*</sup>

<sup>1</sup> Department of Veterinary Medical Sciences, University of Bologna, 40064 Ozzano dell'Emilia, Bologna, Italy; isabel.barranco@unibo.it

<sup>2</sup> Department of Animal and Food Science, School of Veterinary Science, Universitat Autònoma de Barcelona, 08193 Cerdanyola del Vallès, Barcelona, Spain; camila.peres@uab.cat

<sup>3</sup> Interdisciplinary Laboratory of Clinical Analysis Interlab-UMU, Faculty of Veterinary Medicine, Regional Campus of International Excellence 'Campus Mare Nostrum', University of Murcia, 30100 Murcia, Spain; asta@um.es

<sup>4</sup> Department of Medicine and Animal Surgery, Faculty of Veterinary Medicine, University of Murcia, 30100 Murcia, Spain

<sup>5</sup> Department of Biomedical & Clinical Sciences (BKV), BKH/Obstetrics & Gynaecology, Faculty of Medicine and Health Sciences, Linköping University, 58185 Linköping, Sweden; heriberto.rodriguez-martinez@liu.se

\* Correspondence: roca@um.es

## Supplementary Materials:

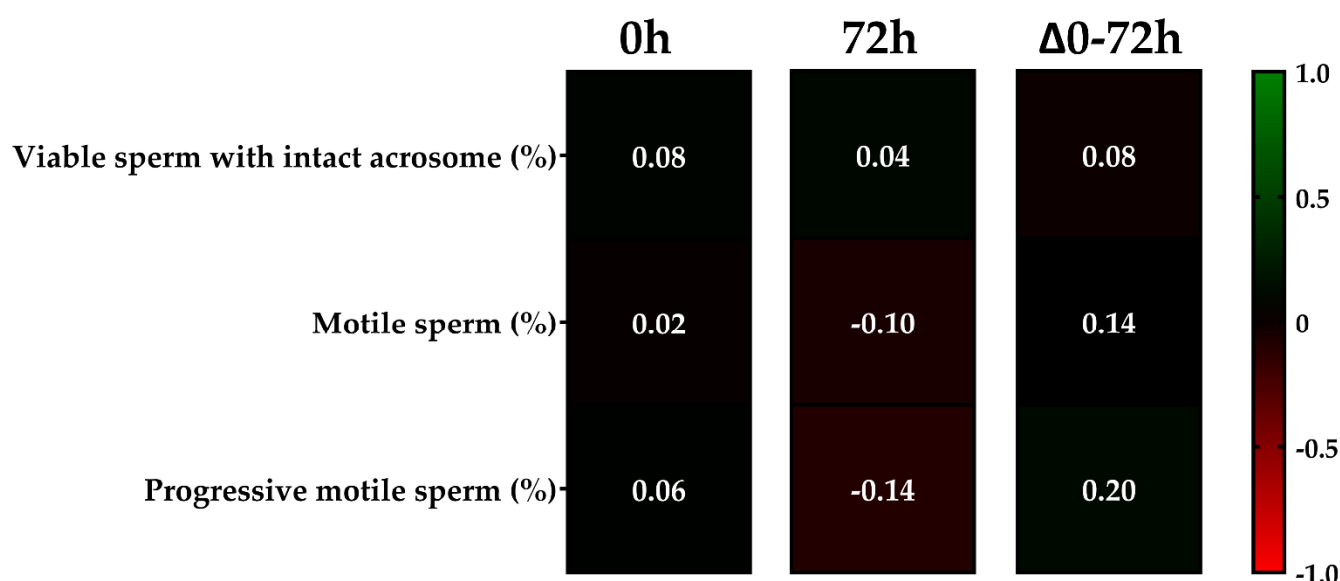

**Figure S1.** Heat map showing Pearson's correlation coefficients between seminal plasma oxidative stress index (OSI) and sperm quality parameters of porcine artificial insemination semen doses (semen AI-doses,  $n = 58$ ). The semen quality parameters were assessed at 0 and 72 h of storage at 17 °C and the correlation coefficients between seminal OSI and the sperm resilience (difference in each sperm quality parameter between evaluation time-points: 0 and 72 h) was also assessed.
